# Supplementary material
Source: publisher figshare collection journal article supplement (https://frontiersin.figshare.com/ndownloader/files/12417176)
Supplement: Supplementary file [file 12417176]

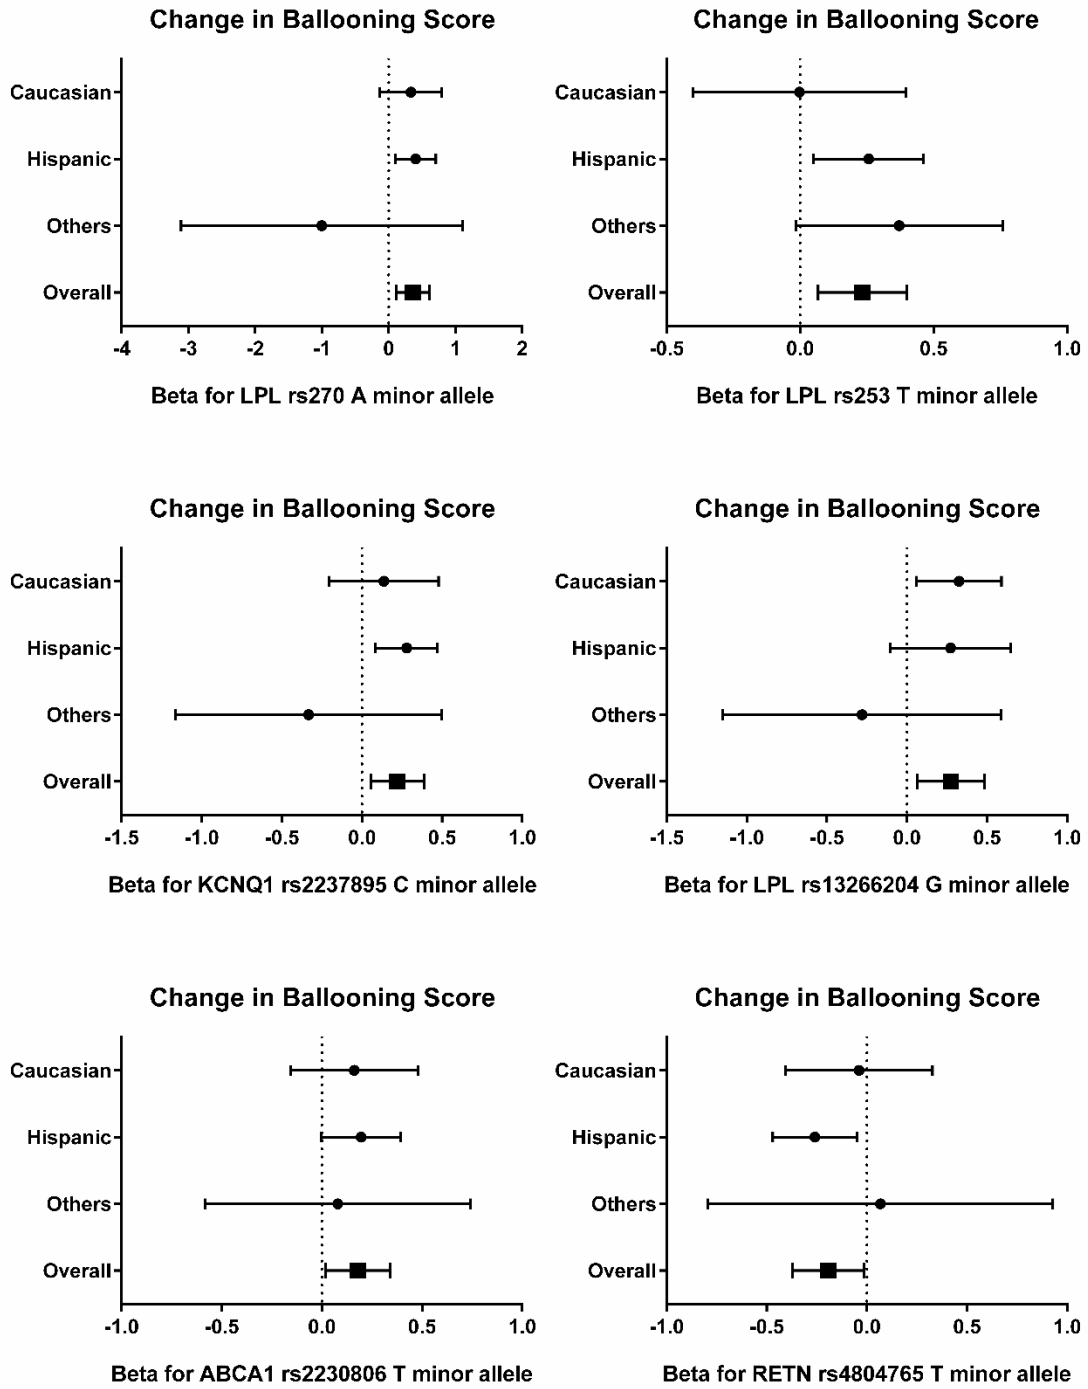

**Figure S4.** Forest plots of the top SNPs for ballooning. The analysis is adjusted for age, gender, and baseline ballooning score.
